# Supplementary material
Source: HighWire-hosted journal article supplement (https://www.cmajopen.ca/highwire/filestream/81229/field_highwire_adjunct_files/0/2018-0198-1-at.pdf)
Supplement: 2018-0198-1-at.pdf [file 2018-0198-1-at.pdf]

**Appendix 1 (as supplied by the authors): Plan design of the Regular Assistance plan in the British Columbia Fair PharmaCare program**

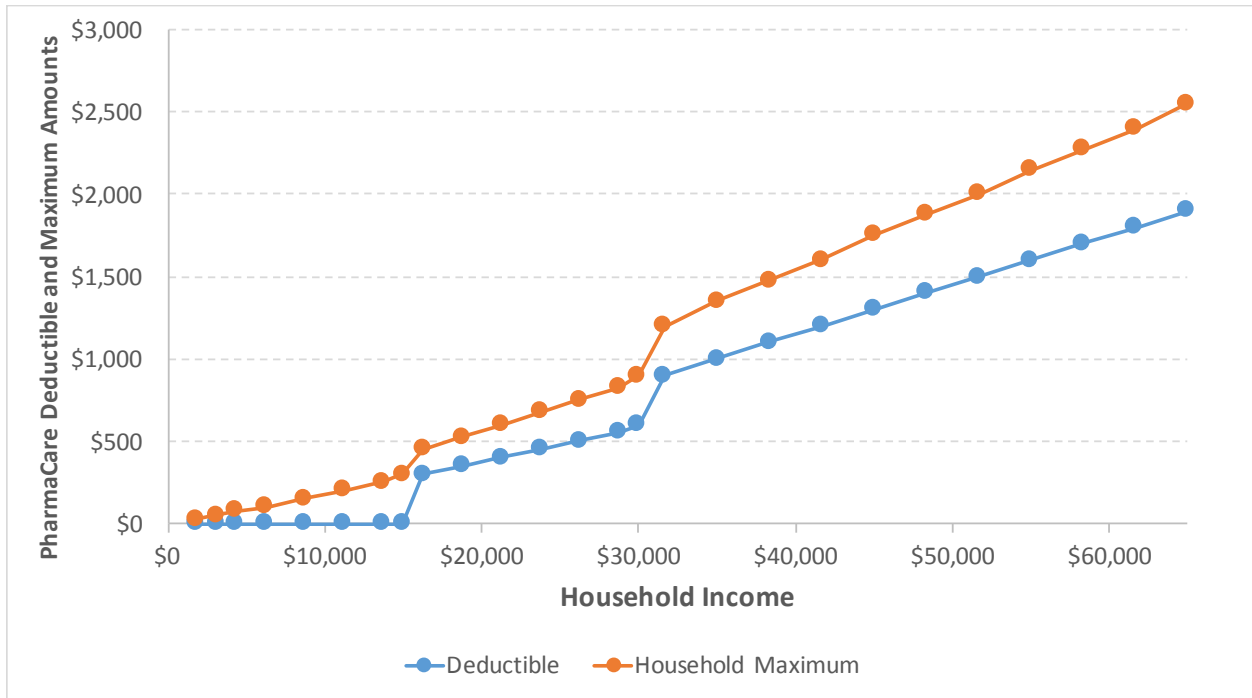

Within each income band, households are first responsible to meet their deductible, then face coinsurance on the price of medicines up to their combined maximum out-of-pocket amount.
